# Supplementary material for: Mn4+ nonequivalent-doped Al3+-based cryolite high-performance warm WLED red phosphors
Source: Royal Society of Chemistry journal article supplement (doi:10.1039/c9nj03607e), 2019-01-01
Supplement: c9nj03607e1.pdf [file c9nj03607e1.pdf]

## Electronic Supplementary Information (ESI)

### Mn<sup>4+</sup> nonequivalent doping Al<sup>3+</sup>-based cryolite high-performance warm WLED red phosphors

Feng Hong, Haiping Xu, Liu Yang, Guixia Liu\*, Chao Song, Xiangting Dong\*, Wensheng Yu,

Key Laboratory of Applied Chemistry and Nanotechnology at Universities of Jilin Province, Changchun University of Science and Technology, Changchun 130022, P. R. China

\*Corresponding author. Tel.: +86-431-85383815; Tel: +86-431-85582574

E-mail address: [liuguixia22@163.com](mailto:liuguixia22@163.com); [dongxiangting888@163.com](mailto:dongxiangting888@163.com).

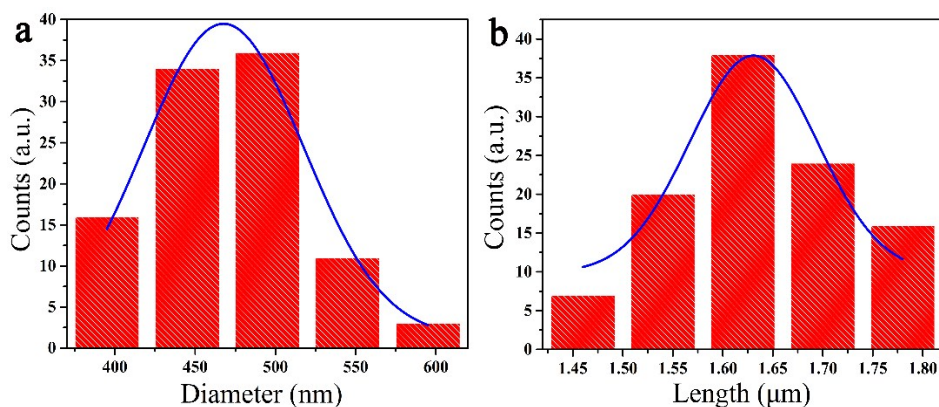

Fig. S1 Histogram of (a) diameter and (b) length of as-prepared Na<sub>3</sub>AlF<sub>6</sub>:Mn<sup>4+</sup> red phosphor by coprecipitation method

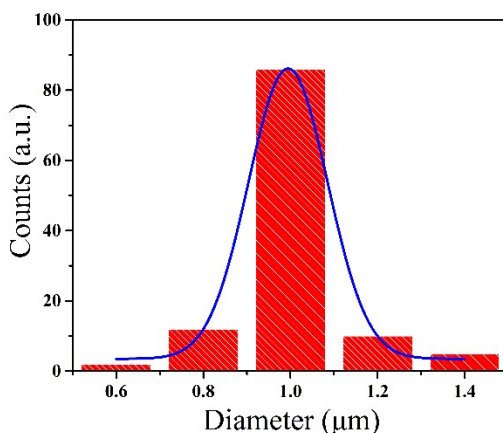

Fig. S2 Histogram of diameter as-prepared of Na<sub>3</sub>AlF<sub>6</sub>:Mn<sup>4+</sup> red phosphor by hydrothermal method

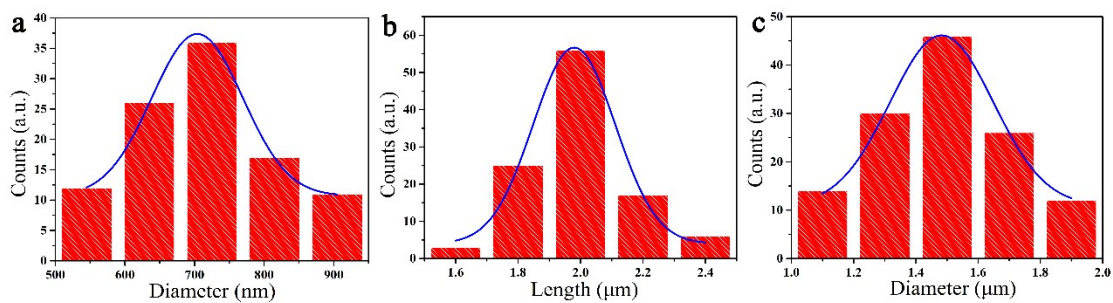

Fig. S3 Histogram of (a) diameter and (b) length of as-prepared  $\text{Na}_3\text{AlF}_6:\text{Mn}^{4+}$  rods and histogram of (c) diameter of as-prepared  $\text{Na}_3\text{AlF}_6:\text{Mn}^{4+}$  particle at hydrothermal time of 1 h

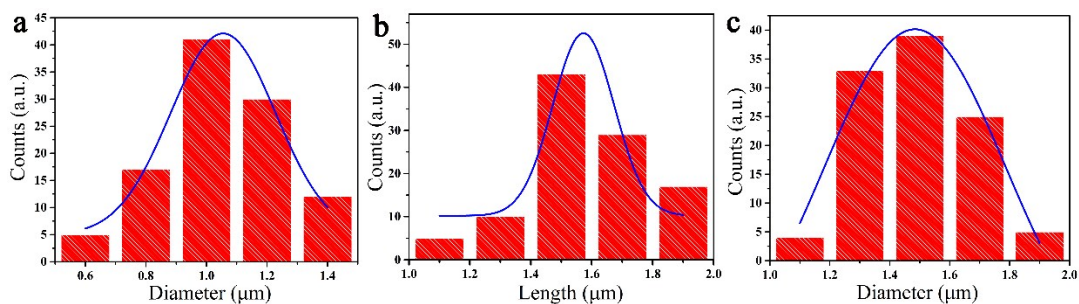

Fig. S4 Histogram of (a) diameter and (b) length of as-prepared  $\text{Na}_3\text{AlF}_6:\text{Mn}^{4+}$  rods and histogram of (c) diameter of as-prepared  $\text{Na}_3\text{AlF}_6:\text{Mn}^{4+}$  particle at hydrothermal time of 5 h

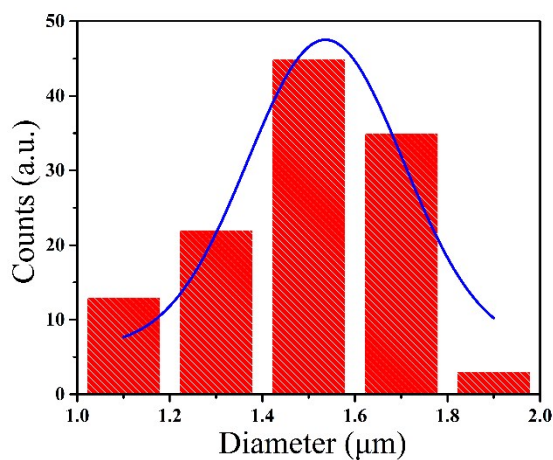

Fig. S5 Histogram of diameter of as-prepared of  $\text{Na}_3\text{AlF}_6:\text{Mn}^{4+}$  red phosphor at hydrothermal time of 15 h

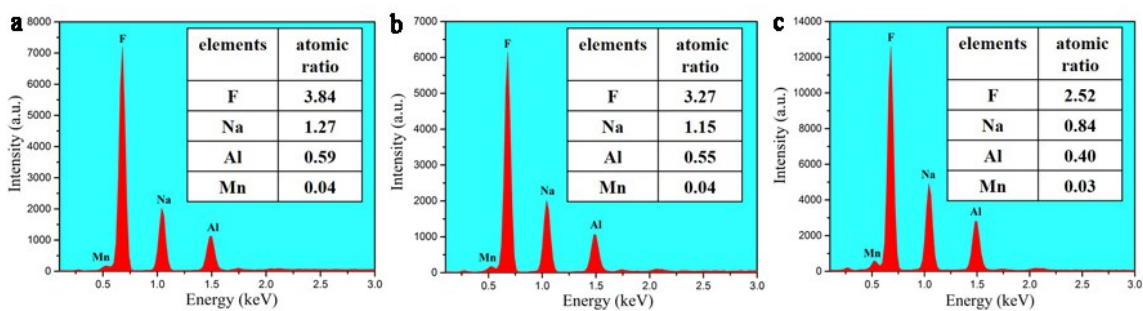

Fig. S6 EDS spectra of as-prepared of  $\text{Na}_3\text{AlF}_6:\text{Mn}^{4+}$  red phosphor by different HF concentration  
(a: 10 %, b: 30 % and c: 40%)

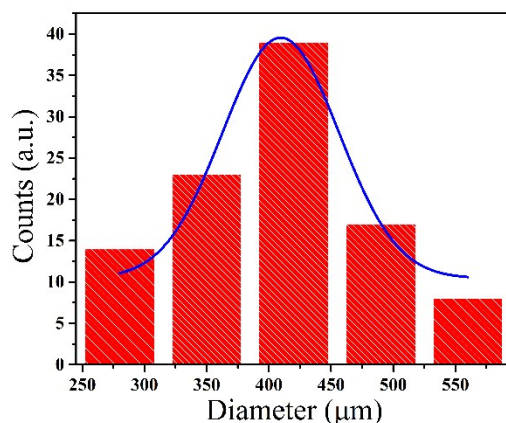

Fig. S7 Histogram of diameter of as-prepared of  $\text{Na}_3\text{AlF}_6:\text{Mn}^{4+}$  red phosphor by ethylene glycol as a reaction solvent

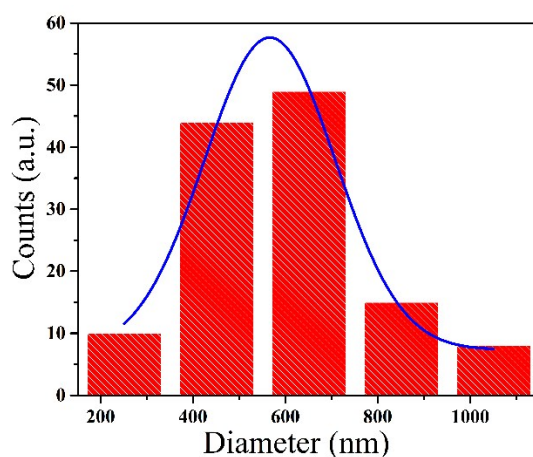

Fig. S8 Histogram of diameter of as-prepared of  $\text{Na}_3\text{AlF}_6:\text{Mn}^{4+}$  red phosphor by ethanol as a reaction solvent

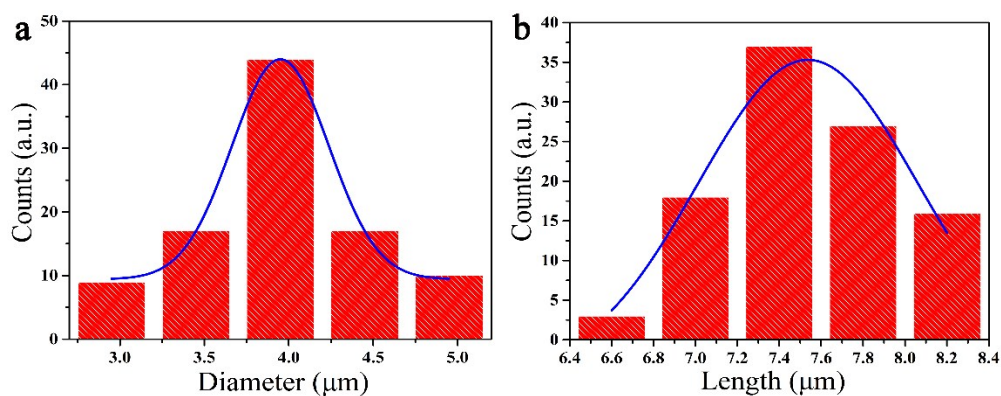

Fig. S9 Histogram of (a) diameter and (b) length of as-prepared  $\text{Na}_3\text{AlF}_6:\text{Mn}^{4+}$  red phosphor by cyclohexane as a reaction solvent
